# Supplementary material for: Adsorptive denitrogenation of model fuels using copper and nickel adsorbents supported on reduced graphene oxide nanosheets
Source: Royal Society of Chemistry journal article supplement (doi:10.1039/d5nj01031d), 2025-01-01
Supplement: d5nj01031d1.pdf [file d5nj01031d1.pdf]

## Supporting Information

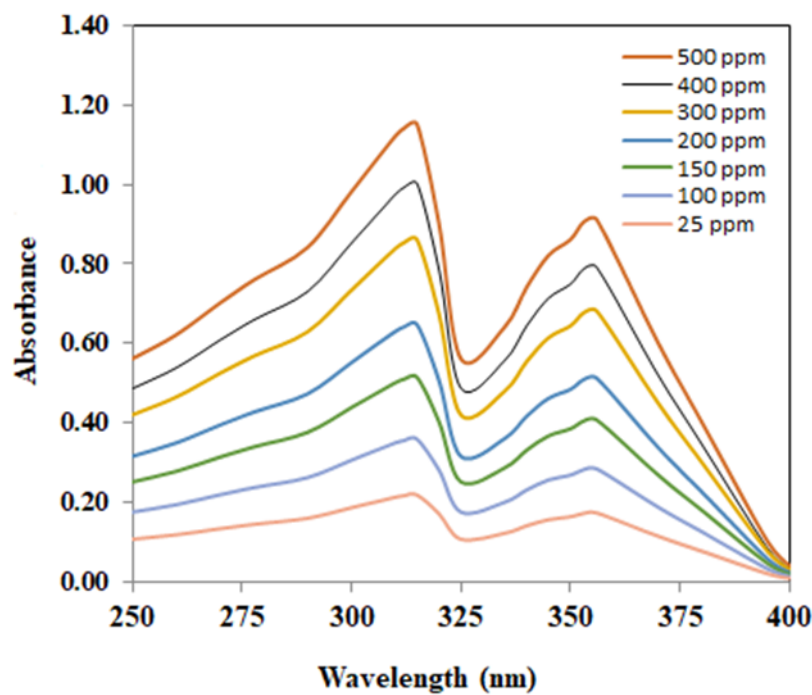

**Figure S1.** The UV absorbance vs. CBZ concentrations in the range of 250 to 400 nm.

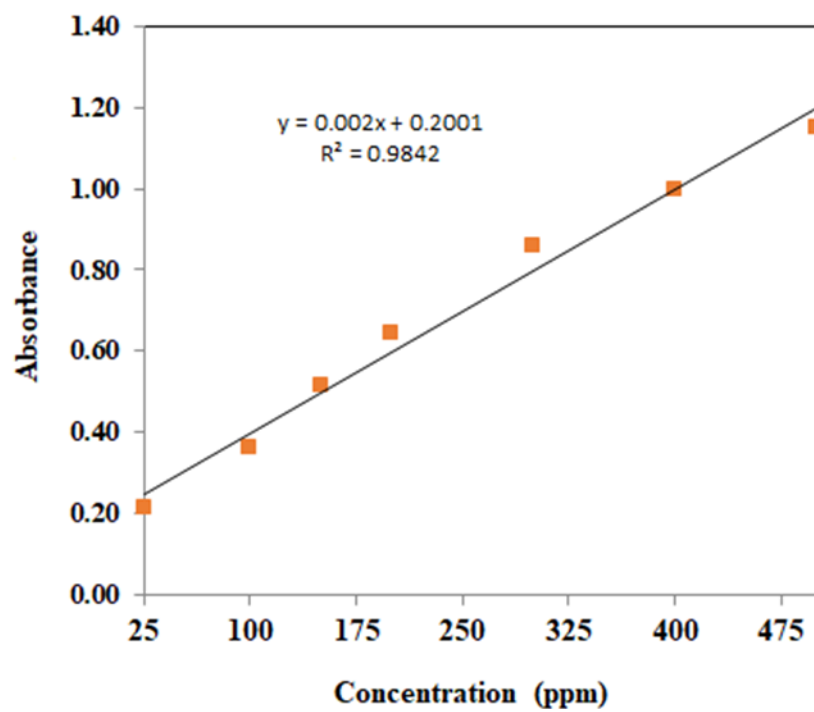

**Figure S2.** Calibration curve of absorbance versus CBZ concentration for the peak at 315 nm.
